# Supplementary material
Source: MDPI journal article supplement (https://www.mdpi.com/2410-3888/8/7/369)
Supplement: s1 [file s1]

Archive with 6 entries (6 files):
- Supplementary figure.pdf
- Supplementary Table S1 - Diversity in each sample.xls
- Supplementary Table S2 - Community structure on phylum level.xlsx
- Supplementary Table S3 - Community structure on genus level.xlsx
- Supplementary Table S4 - Community similarity between individuals.xlsx
- Supplementary Table S5 - Common OTUs.xls
