# Supplementary material
Source: MDPI journal article supplement (https://www.mdpi.com/2410-3888/8/7/369)
Supplement: s1 [file s1 › Supplementary Table S1 - Diversity in each sample.xls]

## Sheet: Sheet1
Table S1 Bacterial diversity indices in each intestinal sample.
Indices	WH1_1	WH1_2	WH2_1	WH2_2	WH3_1	WH3_2	PY1_1	PY1_2	PY2_1	PY2_2	PY3_1	PY3_2
Taxa_S	172	255	258	244	213	149	178	493	131	213	283	135
Individuals	34487	41688	28341	31027	25573	18314	56441	30019	26480	52167	27907	64108
Dominance_D	0.2369	0.2148	0.2218	0.1395	0.3386	0.1317	0.04064	0.1236	0.2847	0.09497	0.1254	0.2762
Simpson_1-D	0.7631	0.7852	0.7782	0.8605	0.6614	0.8683	0.9594	0.8764	0.7153	0.905	0.8746	0.7238
Shannon_H	2.208	2.111	2.301	2.724	1.873	3.005	3.73	3.507	1.884	3.34	3.217	2.129
Brillouin	2.199	2.101	2.285	2.709	1.858	2.987	3.722	3.475	1.874	3.33	3.195	2.124
Menhinick	0.9262	1.249	1.533	1.385	1.332	1.101	0.7492	2.845	0.805	0.9326	1.694	0.5332
Margalef	16.37	23.88	25.07	23.5	20.89	15.08	16.18	47.72	12.76	19.52	27.55	12.11
Equitability_J	0.429	0.381	0.4144	0.4956	0.3493	0.6005	0.7198	0.5657	0.3864	0.623	0.5698	0.4339
Fisher_alpha	23.6	36.17	39.18	36.11	31.84	22.18	22.77	83.78	17.95	28.33	43.82	16.31
Berger-Parker	0.3986	0.3872	0.3957	0.3006	0.5421	0.3263	0.1272	0.329	0.4833	0.2572	0.3006	0.502
Chao-1	248.6	324.5	311.7	378.5	297	215.2	247.5	538.6	201.7	240.8	352.2	176.2
WH' indicates sample from Wuhu lake, 'PY' represents sample from Poyang lake. "_1" indicates the foregut and "_2" indicates the hindgut.
