# Supplementary material
Source: MDPI journal article supplement (https://www.mdpi.com/2410-3888/8/7/369)
Supplement: s1 [file s1 › Supplementary Table S2 - Community structure on phylum level.xlsx]

## Sheet: Sheet1
Table S2 Microbial community composition at phylum level
Phylum	W1-1	W1-2	W2-1	W2-2	W3-1	W3-2	P1-1	P1-2	P2-1	P2-2	P3-1	P3-2
Proteobacteria	28602	14403	15952	17970	21533	7778	15982	5834	18657	29138	2321	12500
Firmicutes	2554	3564	1152	6706	1454	9164	23861	19966	3157	18577	10541	48307
Fusobacteria	2868	23452	9907	6020	2378	768	1978	305	4575	1461	13112	2229
Actinobacteria	1	1	7	30	59	308	9241	79	1	660	232	943
Bacteroidetes	384	249	1303	266	140	232	4	45	32	1881	204	121
Acidobacteria	1	9	0	0	0	48	3611	534	0	125	397	0
Cyanobacteria/Chloroplast	7	6	7	7	7	14	1675	1523	5	5	444	4
Verrucomicrobia	39	1	0	21	1	0	89	1024	2	1	279	0
Planctomycetes	29	0	0	0	0	0	0	476	0	289	331	3
Chloroflexi	0	3	0	0	0	0	0	224	0	0	24	0
Spirochaetes	0	0	0	0	0	0	0	1	51	0	0	1
Gemmatimonadetes	0	0	0	0	0	0	0	2	0	17	18	0
Tenericutes	2	0	2	3	1	2	0	1	0	0	4	0
Synergistetes	0	0	0	0	0	0	0	0	0	13	0	0
Deinococcus-Thermus	0	0	11	0	0	0	0	0	0	0	0	0
OD1	0	0	0	0	0	0	0	5	0	0	0	0
Chlamydiae	0	0	0	4	0	0	0	0	0	0	0	0
