# Supplementary material
Source: MDPI journal article supplement (https://www.mdpi.com/2410-3888/8/7/369)
Supplement: s1 [file s1 › Supplementary Table S3 - Community structure on genus level.xlsx]

## Sheet: Sheet1
Table S3 The microbial community composition on genus level.
Genus	W1-1	W1-2	W2-1	W2-2	W3-1	W3-2	P1-1	P1-2	P2-1	P2-2	P3-1	P3-2
Unclassified	2073	1118	692	6079	1374	8478	23574	18295	2251	16179	3417	46170
Aeromonas	14960	5244	12168	11550	5489	2355	1082	366	18136	884	598	1339
Cetobacterium	1034	7311	3471	4188	2376	768	1978	270	4574	1461	12938	2229
Chitinibacter	9160	7577	1673	3037	13875	222	0	1	1	0	30	0
Fusobacterium	1834	16141	6436	1832	2	0	0	35	1	0	174	0
Catellibacterium	1	6	0	66	4	169	671	70	25	15905	2	3198
Pseudomonas	1773	188	317	152	398	10	710	13	6	438	14	3199
Clostridium XI	0	3	0	1	2	0	0	769	0	0	5287	1
Clostridium sensu stricto	320	2432	298	472	46	372	2	533	4	404	802	2
Vibrio	7	18	10	987	15	1044	529	97	44	1024	77	1533
Serratia	3	9	7	894	10	1387	752	133	81	1371	93	0
Alkanindiges	0	10	17	5	0	0	3582	20	8	0	14	648
Corynebacterium	0	0	0	0	0	131	2952	12	0	0	3	709
Sphingomonas	1	1	3	1	0	82	3343	22	0	41	53	1
Phenylobacterium	0	0	0	0	0	0	0	1746	1	977	293	0
Roseomonas	2	1	0	0	0	0	0	2387	0	7	301	0
Shewanella	1041	643	31	59	635	72	0	1	1	2	0	1
Shinella	67	2	0	187	0	294	548	41	0	1227	22	24
Gp4	0	0	0	0	0	0	2032	0	0	0	258	0
Parabacteroides	0	0	0	0	0	0	0	0	0	1787	0	0
Streptophyta	1	2	1	0	2	0	1673	26	1	1	51	1
Azoarcus	0	3	3	0	0	0	0	0	0	1748	1	0
Yersinia	23	1	0	21	1	0	1360	12	15	0	266	0
Anoxybacillus	115	0	9	31	1	175	19	340	838	143	0	0
Solirubrobacter	0	0	1	0	0	2	1613	0	0	4	0	0
Iodobacter	261	360	122	159	647	6	0	0	0	0	0	0
Salmonella	0	1	0	173	4	502	292	38	2	385	0	22
Psychrobacter	419	98	828	0	6	0	0	0	0	0	0	0
Rubritepida	0	0	0	0	0	0	0	0	0	1346	0	0
GpXI	0	0	0	0	0	0	0	1172	0	0	103	0
Geobacillus	44	0	0	0	0	0	0	0	16	0	0	1212
Spartobacteria_genera_incertae_sedis	0	0	0	0	0	0	0	969	0	0	272	0
Flavobacterium	356	152	383	143	131	64	0	0	0	0	1	0
Aurantimonas	0	0	0	0	0	0	1197	0	0	0	0	0
Nocardioides	0	0	0	0	0	51	1140	0	0	0	1	0
Dokdonella	0	0	0	0	1	0	54	14	16	350	121	603
Phaselicystis	0	0	0	0	0	0	0	0	0	0	0	1115
Streptomyces	0	0	0	0	0	0	1079	0	0	0	0	0
Staphylococcus	0	0	51	23	0	42	0	0	0	841	94	6
Pseudonocardia	0	0	0	0	0	0	1015	0	0	0	0	0
Chryseobacterium	26	62	773	5	3	4	0	6	0	0	0	1
Gp7	0	0	0	0	0	0	874	0	0	0	0	0
Acinetobacter	265	8	23	34	35	412	1	38	10	2	0	4
Pantoea	0	0	0	14	0	79	723	0	2	0	0	0
Saccharofermentans	0	0	0	0	0	0	0	0	0	801	0	0
Sporolactobacillus	0	0	0	0	0	0	0	0	0	0	0	692
Arcobacter	0	38	299	106	8	0	0	0	0	227	0	0
Gp6	1	5	0	0	0	0	163	377	0	0	106	0
Brachybacterium	0	0	0	0	0	0	593	0	0	0	0	0
Aquabacterium	54	5	2	83	1	1	0	8	2	418	0	0
Gp16	0	2	0	0	0	0	538	32	0	0	0	0
Blastopirellula	0	0	0	0	0	0	0	351	0	0	188	0
Limnohabitans	91	3	7	14	4	13	0	24	0	161	0	218
Pedomicrobium	0	0	0	0	0	0	485	0	0	0	10	0
Acidovorax	0	3	32	19	0	0	92	0	13	17	0	314
Turicibacter	0	0	0	0	0	0	0	0	5	0	450	0
Brevundimonas	0	0	1	0	1	0	2	0	0	407	0	1
Kocuria	0	0	0	9	3	0	376	0	0	0	0	0
Cellvibrio	0	0	0	0	0	0	0	38	28	199	100	0
Deefgea	197	37	0	0	120	0	0	0	0	0	0	0
Pseudofulvimonas	0	0	0	0	0	0	0	0	0	348	0	0
Burkholderia	0	0	0	0	2	0	0	0	0	344	0	0
Methylobacterium	0	0	0	0	0	335	0	1	0	0	0	0
Lactococcus	0	2	0	64	13	97	1	0	11	137	9	0
Lysobacter	0	2	0	0	0	151	0	43	132	6	0	0
Micrococcus	0	0	1	0	0	0	0	0	0	287	40	0
GpIIa	0	2	1	3	1	0	0	186	1	2	116	0
Singulisphaera	0	0	0	0	0	0	0	0	0	289	13	0
Bacillariophyta	4	1	1	4	4	1	2	114	2	1	155	1
Desemzia	0	0	0	0	0	0	0	0	0	0	287	0
Bacteroides	1	25	75	23	3	2	0	4	0	0	149	0
Streptococcus	0	0	0	3	1	0	0	0	31	0	0	221
Alkalibacterium	0	0	0	0	0	0	254	0	0	0	0	0
Mycobacterium	1	1	1	2	0	1	1	5	0	0	0	232
Ignatzschineria	14	32	132	60	0	0	0	0	0	0	0	0
Paracoccus	86	3	11	0	1	0	8	1	0	114	2	10
Bordetella	0	0	0	1	8	0	0	1	0	218	0	0
Rhodococcus	0	0	0	6	0	0	15	1	0	166	37	0
Escherichia/Shigella	0	1	1	79	0	96	2	12	7	13	0	0
Comamonas	1	0	2	2	0	162	6	29	0	0	0	1
Desulfovibrio	0	0	0	0	0	0	0	0	0	0	0	202
Methylophilus	0	1	0	0	0	0	178	0	3	0	0	8
Ralstonia	0	0	0	0	0	0	135	0	0	54	1	0
Rhodanobacter	0	0	0	0	0	0	0	0	0	177	0	6
Labrys	0	0	0	0	0	0	0	178	0	0	0	0
Caldilinea	0	0	0	0	0	0	0	152	0	0	22	0
Azohydromonas	0	1	5	0	0	0	0	166	0	0	1	0
Roseateles	0	0	0	45	0	45	0	7	0	75	0	0
Beijerinckia	0	1	0	0	0	0	152	1	0	0	0	0
Planctomyces	29	0	0	0	0	0	0	76	0	0	45	0
Ferruginibacter	0	0	0	0	0	0	0	30	0	0	0	119
Janthinobacterium	0	10	79	18	0	29	0	13	0	0	0	0
Gp17	0	2	0	0	0	0	0	108	0	0	33	0
Oxalicibacterium	1	0	0	0	0	0	0	0	0	126	13	0
Herminiimonas	1	0	11	0	125	0	0	0	0	0	0	0
Rudaea	0	0	0	0	0	0	0	0	0	132	0	5
Nevskia	0	0	0	0	0	0	0	0	0	130	0	0
Novosphingobium	34	0	0	0	0	93	0	0	0	0	0	0
Gp2	0	0	0	0	0	1	0	0	0	125	0	0
Rathayibacter	0	0	0	0	0	0	112	0	0	0	11	0
Marmoricola	0	0	0	1	0	97	0	0	0	0	24	0
Bdellovibrio	96	0	2	6	0	0	0	1	0	0	15	0
Pedobacter	0	4	6	45	0	49	0	0	12	0	0	0
Luteimonas	0	0	7	0	0	0	0	0	0	108	0	0
Undibacterium	0	2	1	0	112	0	0	0	0	0	0	0
Grimontia	39	10	0	5	0	0	0	3	42	0	9	0
Bosea	1	0	19	13	7	62	0	0	0	1	0	0
Rhodopirellula	0	0	0	0	0	0	0	28	0	0	72	3
Phycicoccus	0	0	0	0	0	0	98	0	0	0	0	0
Haloferula	0	0	0	0	0	0	89	0	0	0	6	0
Sphingobacterium	0	1	0	0	0	0	0	0	0	94	0	0
Desulfomonile	0	0	0	0	0	0	0	45	0	0	49	0
Yaniella	0	0	0	0	0	0	94	0	0	0	0	0
Anaeromyxobacter	0	0	0	0	0	89	0	0	0	0	0	0
Cloacibacterium	0	0	0	5	0	57	0	0	20	0	2	0
Pseudoclavibacter	0	0	0	0	0	0	0	0	0	81	0	0
Variovorax	0	0	0	0	0	0	0	0	1	0	77	0
Methyloversatilis	0	1	6	0	0	0	0	10	0	60	0	0
Bellilinea	0	3	0	0	0	0	0	70	0	0	2	0
Devosia	0	0	0	0	0	0	0	0	46	0	26	0
Curtobacterium	0	0	0	0	0	0	70	1	0	0	0	0
Dietzia	0	0	0	0	0	0	71	0	0	0	0	0
Arthrobacter	0	0	0	0	56	0	0	13	0	0	0	0
Oscillibacter	0	0	0	0	0	0	0	0	0	0	69	0
Mogibacterium	0	0	1	0	0	0	0	0	0	61	0	0
Porphyrobacter	0	0	0	0	0	0	61	0	0	0	1	0
Janibacter	0	0	0	0	0	0	0	0	0	60	0	0
Salinicoccus	0	0	60	0	0	0	0	0	0	0	0	0
Tolumonas	0	0	0	14	0	5	1	4	0	0	2	34
Methylotenera	0	24	35	0	0	0	0	0	0	0	0	0
Prosthecobacter	39	0	0	16	0	0	0	0	0	0	0	0
Brevinema	0	0	0	0	0	0	0	1	51	0	0	1
Steroidobacter	0	8	0	0	0	0	0	38	0	0	6	0
Chlorophyta	0	0	0	0	0	13	0	25	0	0	13	0
Geodermatophilus	0	0	0	0	0	0	0	17	0	0	34	0
Spirosoma	0	0	0	0	0	0	0	0	0	0	51	0
Massilia	0	0	4	36	8	0	0	0	0	0	0	0
Granulicella	0	0	0	0	0	47	0	0	0	0	0	0
Sediminibacterium	0	2	0	0	1	43	1	0	0	0	0	0
Polynucleobacter	0	0	2	0	1	25	0	0	1	0	17	0
Clostridium XlVb	0	0	0	0	0	0	0	0	0	0	45	0
Enhydrobacter	0	7	9	18	2	0	0	0	0	0	8	1
Rhizobium	0	0	0	20	0	16	2	0	0	3	0	4
Actinoallomurus	0	0	0	0	0	0	0	0	0	42	0	0
Gardnerella	0	0	0	0	0	0	0	0	0	0	42	0
Polaromonas	0	15	15	2	0	0	0	0	0	6	0	1
Syntrophobacter	0	0	0	0	0	0	0	39	0	0	0	0
Gemmatimonas	0	0	0	0	0	0	0	2	0	17	18	0
Stenotrophomonas	0	0	0	17	0	0	1	0	0	19	0	0
Desulfatirhabdium	0	0	0	0	0	0	0	36	0	0	0	0
Xanthomonas	0	0	36	0	0	0	0	0	0	0	0	0
Epilithonimonas	0	1	34	0	0	0	0	0	0	0	0	0
Hydrogenophaga	1	0	0	8	0	0	0	0	23	0	0	1
Thermomonas	0	5	5	22	0	0	0	0	0	0	0	0
Myroides	0	1	0	30	0	0	0	0	0	0	0	0
Gemmobacter	0	0	0	0	0	0	1	0	1	25	0	3
Atopobium	0	0	0	1	0	0	0	0	0	0	28	0
Proteocatella	0	6	17	0	6	0	0	0	0	0	0	0
Megasphaera	0	0	0	0	0	0	0	0	0	0	28	0
Aeromicrobium	0	0	0	0	0	26	0	0	0	0	1	0
Bacillus	1	0	0	1	0	0	0	0	0	0	25	0
Legionella	0	0	0	0	0	0	0	27	0	0	0	0
Verrucomicrobium	0	0	0	0	0	0	0	27	0	0	0	0
Methylocystis	0	0	0	0	0	0	0	16	0	0	10	0
Pasteuria	0	0	0	0	0	0	6	19	0	0	0	0
Aquicella	0	0	0	0	0	0	0	23	0	0	0	0
Skermanella	0	0	0	0	0	0	0	0	0	0	22	0
Flectobacillus	0	0	21	0	0	0	0	0	0	0	0	0
Thauera	0	0	0	0	0	0	0	0	0	2	19	0
Hyphomicrobium	0	0	0	0	0	20	0	0	0	0	0	0
Ahrensia	0	0	0	0	0	0	0	19	0	0	0	0
Olsenella	0	0	2	0	0	0	0	17	0	0	0	0
Methylococcus	0	0	0	0	0	0	0	0	0	0	18	0
Dyadobacter	0	0	0	13	0	0	0	4	0	0	0	0
Gp25	0	0	0	0	0	0	0	17	0	0	0	0
Azotobacter	0	0	0	0	0	0	0	0	0	0	16	0
Isosphaera	0	0	0	0	0	0	0	16	0	0	0	0
Weissella	1	2	0	1	2	0	0	0	1	0	9	0
Dechloromonas	0	8	0	0	7	0	0	0	0	0	0	0
Kitasatospora	0	0	0	0	0	0	7	0	0	8	0	0
Mycoplasma	2	0	2	3	1	2	0	1	0	0	4	0
Peptoniphilus	0	0	0	15	0	0	0	0	0	0	0	0
Syntrophorhabdus	0	0	0	0	0	0	0	15	0	0	0	0
Xiphinematobacter	0	0	0	0	0	0	0	15	0	0	0	0
Arenimonas	0	3	0	0	0	0	0	0	0	10	0	0
Bradyrhizobium	0	0	0	0	2	0	0	0	0	10	1	0
Gemmata	0	0	0	0	0	0	0	0	0	0	13	0
Petrimonas	0	0	0	0	0	13	0	0	0	0	0	0
Rhodobacter	1	1	10	0	1	0	0	0	0	0	0	0
Thermovirga	0	0	0	0	0	0	0	0	0	13	0	0
Alcaligenes	0	0	0	12	0	0	0	0	0	0	0	0
Caulobacter	2	0	0	10	0	0	0	0	0	0	0	0
Brevibacterium	0	0	0	11	0	0	0	0	0	0	0	0
Clostridium III	0	0	0	0	0	0	0	0	0	0	11	0
Coprococcus	0	0	11	0	0	0	0	0	0	0	0	0
Deinococcus	0	0	11	0	0	0	0	0	0	0	0	0
Kytococcus	0	0	0	0	0	0	0	0	0	11	0	0
Pseudolabrys	0	0	0	1	0	0	0	0	0	10	0	0
Pseudorhodoferax	0	0	0	0	0	0	0	2	0	0	9	0
Tepidibacter	0	0	0	0	0	0	0	3	0	0	8	0
Zoogloea	0	0	0	0	0	0	0	2	9	0	0	0
Aciditerrimonas	0	0	0	0	0	0	0	10	0	0	0	0
Luteolibacter	0	0	0	1	0	0	0	9	0	0	0	0
Methylobacter	0	0	0	0	0	0	0	6	0	0	4	0
Enterococcus	0	0	0	6	3	0	0	0	0	0	0	0
Faecalibacterium	0	0	0	0	0	0	0	0	0	9	0	0
Pseudochrobactrum	0	0	9	0	0	0	0	0	0	0	0	0
Sarcina	0	1	0	0	1	0	0	5	0	1	0	1
Allomonas	0	1	0	5	0	0	0	1	0	0	0	1
Altererythrobacter	0	0	0	0	0	0	8	0	0	0	0	0
Atopostipes	0	0	8	0	0	0	0	0	0	0	0	0
Desulfobacca	0	0	0	0	0	0	0	7	0	0	0	0
Methylocaldum	0	0	0	0	0	0	0	7	0	0	0	0
Cryptomonadaceae	1	0	3	0	0	0	0	0	0	1	0	1
Dongia	0	0	0	6	0	0	0	0	0	0	0	0
Iamia	0	0	0	0	0	0	0	1	0	0	5	0
Nocardiopsis	0	0	0	0	0	0	0	0	0	0	6	0
Persicitalea	0	0	6	0	0	0	0	0	0	0	0	0
Frondihabitans	0	0	0	0	0	0	5	0	0	0	0	0
GpIV	0	0	0	0	0	0	0	0	0	0	5	0
Lawsonia	0	0	0	0	0	0	0	0	0	5	0	0
Leuconostoc	0	0	0	1	0	0	1	0	0	1	0	2
OD1_genera_incertae_sedis	0	0	0	0	0	0	0	5	0	0	0	0
Opitutus	0	0	0	4	0	0	0	0	0	1	0	0
Rheinheimera	0	0	0	3	0	0	0	0	1	1	0	0
Schlesneria	0	0	0	0	0	0	0	5	0	0	0	0
Vampirovibrio	0	0	0	0	0	0	0	5	0	0	0	0
Brochothrix	0	0	0	0	4	0	0	0	0	0	0	0
Clostridium XVIII	0	0	0	4	0	0	0	0	0	0	0	0
Gp3	0	0	0	0	0	0	4	0	0	0	0	0
GpVI	1	1	1	0	0	0	0	0	1	0	0	0
Herbaspirillum	0	0	0	1	2	0	0	1	0	0	0	0
Lactobacillus	0	0	1	1	0	0	0	2	0	0	0	0
Parachlamydia	0	0	0	4	0	0	0	0	0	0	0	0
Peredibacter	0	0	4	0	0	0	0	0	0	0	0	0
Sphingobium	0	0	0	0	0	0	0	4	0	0	0	0
Subdivision5_genera_incertae_sedis	0	0	0	0	0	0	0	4	0	0	0	0
Amaricoccus	0	3	0	0	0	0	0	0	0	0	0	0
Aminobacter	0	0	0	0	0	0	0	0	0	0	0	3
Cedecea	0	0	0	0	0	0	0	0	0	3	0	0
Chitinophaga	0	0	0	0	0	0	3	0	0	0	0	0
Clostridium IV	0	0	3	0	0	0	0	0	0	0	0	0
Desulfobulbus	0	3	0	0	0	0	0	0	0	0	0	0
Desulfocapsa	0	3	0	0	0	0	0	0	0	0	0	0
Lysinibacillus	0	0	0	0	0	0	3	0	0	0	0	0
Peptostreptococcus	0	0	0	3	0	0	0	0	0	0	0	0
Subdivision3_genera_incertae_sedis	0	1	0	0	0	0	0	0	1	0	1	0
Terrimonas	1	1	0	0	1	0	0	0	0	0	0	0
Arcicella	0	0	0	2	0	0	0	0	0	0	0	0
Azorhizobium	0	0	0	0	0	0	0	2	0	0	0	0
Buttiauxella	0	0	0	0	0	1	1	0	0	0	0	0
Carnobacterium	0	0	1	0	1	0	0	0	0	0	0	0
Cerasicoccus	0	0	0	0	1	0	0	0	1	0	0	0
Conexibacter	0	0	0	0	0	0	0	2	0	0	0	0
Desulfobacterium	0	0	2	0	0	0	0	0	0	0	0	0
GpIII	0	0	0	0	0	0	0	0	0	0	1	1
Haliscomenobacter	0	0	0	0	0	0	0	0	0	0	1	1
Hydrogenophilus	0	1	1	0	0	0	0	0	0	0	0	0
Hymenobacter	0	0	2	0	0	0	0	0	0	0	0	0
Lishizhenia	0	0	2	0	0	0	0	0	0	0	0	0
Planococcaceae_incertae_sedis	0	0	0	1	0	0	1	0	0	0	0	0
Propionibacterium	0	0	0	0	0	0	0	0	0	0	0	2
Rothia	0	0	2	0	0	0	0	0	0	0	0	0
Sphaerobacter	0	0	0	0	0	0	0	2	0	0	0	0
Sphingosinicella	0	0	0	0	0	0	2	0	0	0	0	0
Uliginosibacterium	0	0	1	0	0	0	1	0	0	0	0	0
Agrococcus	0	0	0	0	0	0	0	0	0	1	0	0
Algoriphagus	0	0	0	0	1	0	0	0	0	0	0	0
Enterobacter	0	0	0	1	0	0	0	0	0	0	0	0
Fluviicola	0	0	1	0	0	0	0	0	0	0	0	0
Ilumatobacter	0	0	0	0	0	0	0	0	1	0	0	0
Kaistia	0	0	0	1	0	0	0	0	0	0	0	0
Kerstersia	0	0	0	0	0	0	0	0	0	1	0	0
Naxibacter	0	0	0	1	0	0	0	0	0	0	0	0
Niabella	0	0	0	0	0	0	0	1	0	0	0	0
Pelomonas	0	0	0	0	0	1	0	0	0	0	0	0
Pseudoxanthomonas	0	0	0	0	0	0	0	0	0	1	0	0
Silanimonas	0	0	0	0	1	0	0	0	0	0	0	0
Sphingopyxis	0	1	0	0	0	0	0	0	0	0	0	0
Tatumella	0	0	0	1	0	0	0	0	0	0	0	0
Vogesella	0	0	0	1	0	0	0	0	0	0	0	0
