# Supplementary material
Source: MDPI journal article supplement (https://www.mdpi.com/2410-3888/8/7/369)
Supplement: s1 [file s1 › Supplementary Table S4 - Community similarity between individuals.xlsx]

## Sheet: Sheet1
Table S4 The Bray–Curtis distance and correlation (R2) between the foregut and hindgut microbial community in each individual fish.
Fish	Bray-Curtis distance	R2
WH1	0.54	0.27
WH2	0.44	0.67
WH3	0.88	0.02
PY1	0.87	0.1
PY2	0.92	0.002
PY3	0.93	0.005
Abbreviations: WH, Wuhu Lake; PY, Poyang Lake. The R2 values were obtained by doing linear regression using the abundances of OTUs in each individual fish.
