# Supplementary material
Source: MDPI journal article supplement (https://www.mdpi.com/2410-3888/8/7/369)
Supplement: s1 [file s1 › Supplementary Table S5 - Common OTUs.xls]

## Sheet: Sheet1
Table S5 Classification of the common OTUs.
Domain	Phylum	Class	Order	Family	Genus	OTU_Name	0TU_ Abundance
Bacteria	Actinobacteria	Actinobacteria	Actinomycetales	Mycobacteriaceae	Mycobacterium	OTU_786	195
	Bacteroidetes	Unclassified	Unclassified	Unclassified	Unclassified	OTU_1605	986
						OTU_220	137
	Cyanobacteria/Chloroplast	Chloroplast	Unclassified	Chloroplast	Bacillariophyta	OTU_538	14
					Streptophyta	OTU_957	425
		Cyanobacteria	Unclassified	Family II	GpIIa	OTU_944	85
						OTU_699	54
	Firmicutes	Bacilli	Bacillales	Bacillaceae 1	Anoxybacillus	OTU_93	1633
						OTU_720	20
				Staphylococcaceae	Staphylococcus	OTU_222	1053
				Unclassified	Unclassified	OTU_173	148
			Lactobacillales	Streptococcaceae	Lactococcus	OTU_2286	315
		Clostridia	Clostridiales	Clostridiaceae 1	Clostridium sensu stricto	OTU_77	3902
						OTU_771	52
				Peptostreptococcaceae	Clostridium XI	OTU_2276	3250
		Unclassified	Unclassified	Unclassified	Unclassified	OTU_118	46210
	Fusobacteria	Fusobacteria	Fusobacteriales	Fusobacteriaceae	Cetobacterium	OTU_2354	18206
						OTU_740	7332
						OTU_2275	183
						OTU_2301	130
					Fusobacterium	OTU_2329	26253
	Proteobacteria	Alphaproteobacteria	Rhizobiales	Rhizobiales_incertae_sedis	Unclassified	OTU_159	76
			Rhodobacterales	Rhodobacteraceae	Catellibacterium	OTU_62	16923
					Unclassified	OTU_776	216
			Rhodospirillales	Acetobacteraceae	Roseomonas	OTU_46	957
		Betaproteobacteria	Burkholderiales	Alcaligenaceae	Azohydromonas	OTU_460	173
				Comamonadaceae	Acidovorax	OTU_131	490
					Comamonas	OTU_913	185
					Hydrogenophaga	OTU_730	33
					Unclassified	OTU_1487	159
			Rhodocyclales	Rhodocyclaceae	Shinella	OTU_155	1864
		Gammaproteobacteria	Aeromonadales	Aeromonadaceae	Aeromonas	OTU_518	51877
						OTU_28	16472
						OTU_1990	1483
						OTU_1321	601
						OTU_863	38
						OTU_498	2028
						OTU_151	154
						OTU_726	475
						OTU_1515	81
						OTU_1926	14
						OTU_1918	603
						OTU_2052	83
						OTU_1404	20
			Alteromonadales	Shewanellaceae	Shewanella	OTU_1211	1202
			Enterobacteriales	Enterobacteriaceae	Escherichia/Shigella	OTU_752	190
				Enterobacteriaceae	Salmonella	OTU_731	1419
					Serratia	OTU_47	4737
					Unclassified	OTU_71	26296
						OTU_88	7243
						OTU_15	59
						OTU_1349	351
						OTU_968	186
						OTU_623	47
						OTU_1388	892
					Yersinia	OTU_1108	1691
			Pseudomonadales	Moraxellaceae	Acinetobacter	OTU_1209	258
					Enhydrobacter	OTU_9	45
				Pseudomonadaceae	Pseudomonas	OTU_170	326
						OTU_274	859
						OTU_1906	216
						OTU_1403	376
						OTU_1206	96
						OTU_1900	363
			Unclassified	Unclassified	Unclassified	OTU_352	426
						OTU_1758	121
						OTU_1154	52
						OTU_823	27
						OTU_57	619
			Vibrionales	Vibrionaceae	Grimontia	OTU_1012	102
					Vibrio	OTU_202	5362
						OTU_87	23
	Tenericutes	Mollicutes	Mycoplasmatales	Mycoplasmataceae	Mycoplasma	OTU_2291	15
